# Supplementary material
Source: PubMed Central journal article supplement (PMC3420182)
Supplement: 1121495109_pnas.1121495109_SI.pdf [file 1121495109_pnas.1121495109_SI.pdf]

# Supporting Information

Zhang et al. 10.1073/pnas.1121495109

## SI Text

**SI Methods. 3D imaging.** 3D SHG imaging was performed by using a precision PZT stage with a scan accuracy/resolution better than  $0.1\ \mu\text{m}$  (PI E-625.CR) to control the imaging depth. During imaging, the mouse cervical tissue section was mounted on the stage and moved relative to the endoscope. Z-stack images were ac-

quired with a  $0.5\text{-}\mu\text{m}$  interval through a  $15\text{-}\mu\text{m}$  thick middle portion of the tissue. Five images were averaged at each interval. Each z-stack was cropped into a  $75\ \mu\text{m} \times 75\ \mu\text{m}$  square field of view and reconstructed into a 3D image with the “3D project” function of ImageJ.

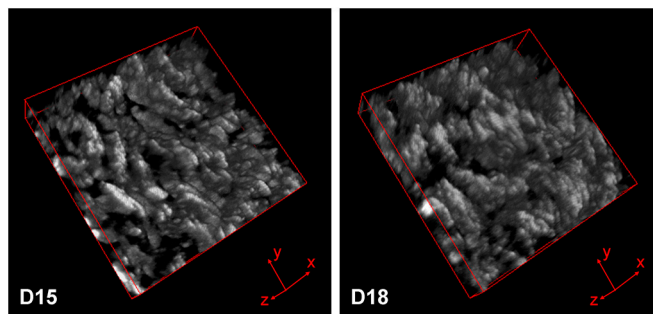

**Fig. S1.** Representative 3D projection images of mouse cervical tissue sections of gestation day 15 and day 18. Images were taken with a  $0.5\text{-}\mu\text{m}$  interval and a total imaging depth of  $15\ \mu\text{m}$ . The lateral image size was cropped into  $75\ \mu\text{m} \times 75\ \mu\text{m}$  to better reveal the cross-sectional structure.

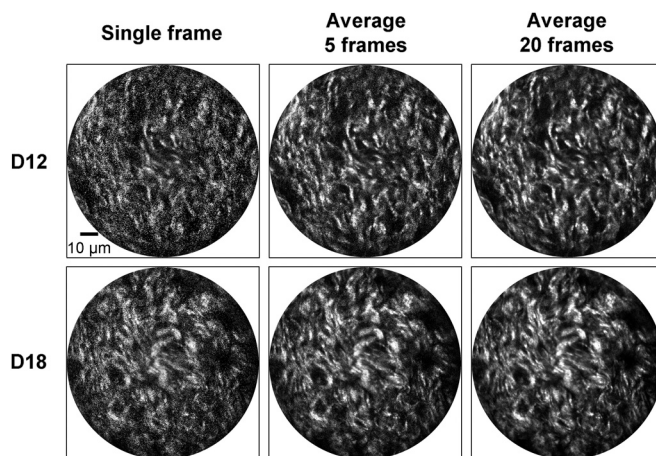

**Fig. S2.** Comparison of SHG images averaged over different numbers of frames from mouse cervical tissue sections of gestation day 12 and day 18. Columns from *Left to Right* show images with no averaging, averaged with 5 frames and averaged with 20 frames. The good quality of the image acquired, even with no averaging, shows that the signal to noise ratio and speed of the endomicroscope system is potentially adequate for clinical application.
